# Supplementary material for: Echocardiographic Parameters for Risk Prediction in Borderline Right Ventricle: Review with Special Emphasis on Pulmonary Atresia with Intact Ventricular Septum and Critical Pulmonary Stenosis
Source: MDPI journal article supplement (doi:10.3390/jcm12144599), 2023-07-10
Supplement: s1 [file s1]

**Table S1:** Inclusion/exclusion criteria in major studies evaluating echocardiographic parameters for risk prediction in PA IVS/CPS

|                                     | <b>Inclusion criteria</b>                                                                                          | <b>Exclusion criteria</b>                                                                                                                                               |
|-------------------------------------|--------------------------------------------------------------------------------------------------------------------|-------------------------------------------------------------------------------------------------------------------------------------------------------------------------|
| Cho MJ 2013<br>South Korea<br>[4]   | PA IVS; CPS                                                                                                        | Failure to perforate the PV                                                                                                                                             |
| Chen RHS 2018<br>Hong Kong<br>[5]   | PA IVS who attempt CBPV                                                                                            | Patients who received a previous shunt<br>Unipartite RV, RV dependent coronary circulation, muscular type atresia, significant TV anomalies (such as Ebstein's anomaly) |
| Yucel IK, 2016<br>Turkey<br>[6]     | CPS                                                                                                                | Non-critical PS                                                                                                                                                         |
| Alwi M, 2005,<br>Malaysia<br>[8]    | PA IV RFV                                                                                                          | None                                                                                                                                                                    |
| Drighil A<br>2009, USA<br>[9]       | PA IVS undergoing CBPV                                                                                             | Diminutive RV, TV z score <3, absence or RV infundibulum                                                                                                                |
| Schwartz<br>MC, 2006, USA<br>[10]   | PA IVS undergoing RFV                                                                                              | Ebstein's anomaly                                                                                                                                                       |
| Cleuziou J, 2010<br>Germany<br>[11] | PA IVS                                                                                                             | None                                                                                                                                                                    |
| Maskatia SA,<br>2018, USA<br>[1]    | PA IVS underwent decompression at < 30 days                                                                        | CPS, Ebstein's anomaly                                                                                                                                                  |
| Minich LL 2000<br>USA<br>[13]       | PA IVS<br>Attempting surgical opening RVOT                                                                         | NR                                                                                                                                                                      |
| Petit CJ 2017<br>[2]                | PA IVS<br>Candidates for RV decompression (either surgical or percutaneous, underwent intervention within 30 days) | CPS, Ebstein's anomaly RV decompression after neonatal age                                                                                                              |
| Giordano M 2022<br>Italy<br>[3]     | PA IVS, CPS                                                                                                        | Severe RV hypoplasia, RV dependent coronary circulation                                                                                                                 |

**Legend to Table:** CPS= critical pulmonary stenosis, CBPV= catheter balloon valvuloplasty; PPV=positive predictive value, NPV=negative predictive value, NR=not reported, SPS=severe pulmonary stenosis, RV=right ventricle; RFV=radio-frequency perforation and valvuloplasty, RVOT=right outflow tract.
